# Supplementary material for: Transparent semiconductor–polymer hybrid films with tunable optical properties
Source: Royal Society of Chemistry journal article supplement (doi:10.1039/b613694j), 2007-01-01
Supplement: b613694j.pdf [file b613694j.pdf]

## Transparent semiconductor-polymer hybrid films with tunable optical properties

Y. Martínez, J. Retuert, M. Yazdani-Pedram, H. Cölfen\*

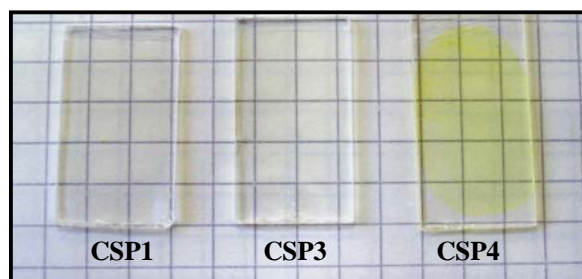

**Figure S1.** Image of the CdS-hybrid films composites with different CHI:SiO<sub>2</sub>:PMMI molar ratios deposited on quartz substrates; CSP1) 1:1:0.3, CSP3) 0.6:1:0.3, CSP4) 0.4:1:0.5
